# Supplementary material for: NF‐κB/IKK activation by small extracellular vesicles within the SASP
Source: PubMed Central journal article supplement (PMC8282244; doi:10.1111/acel.13426), 2021-06-29

(a)

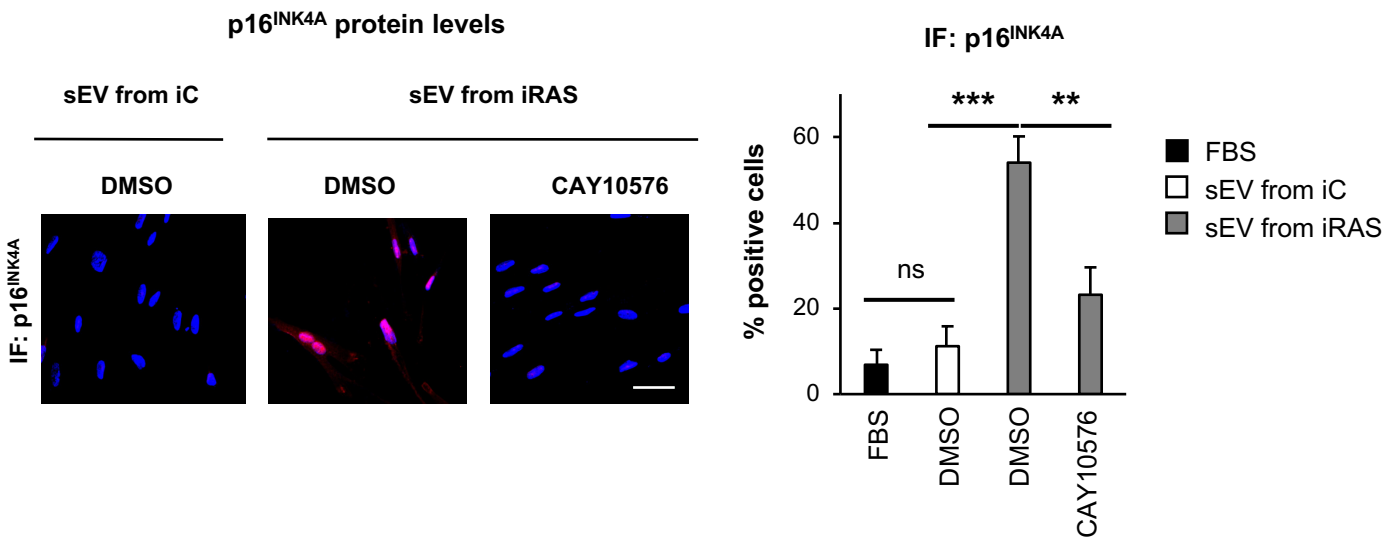

(b)

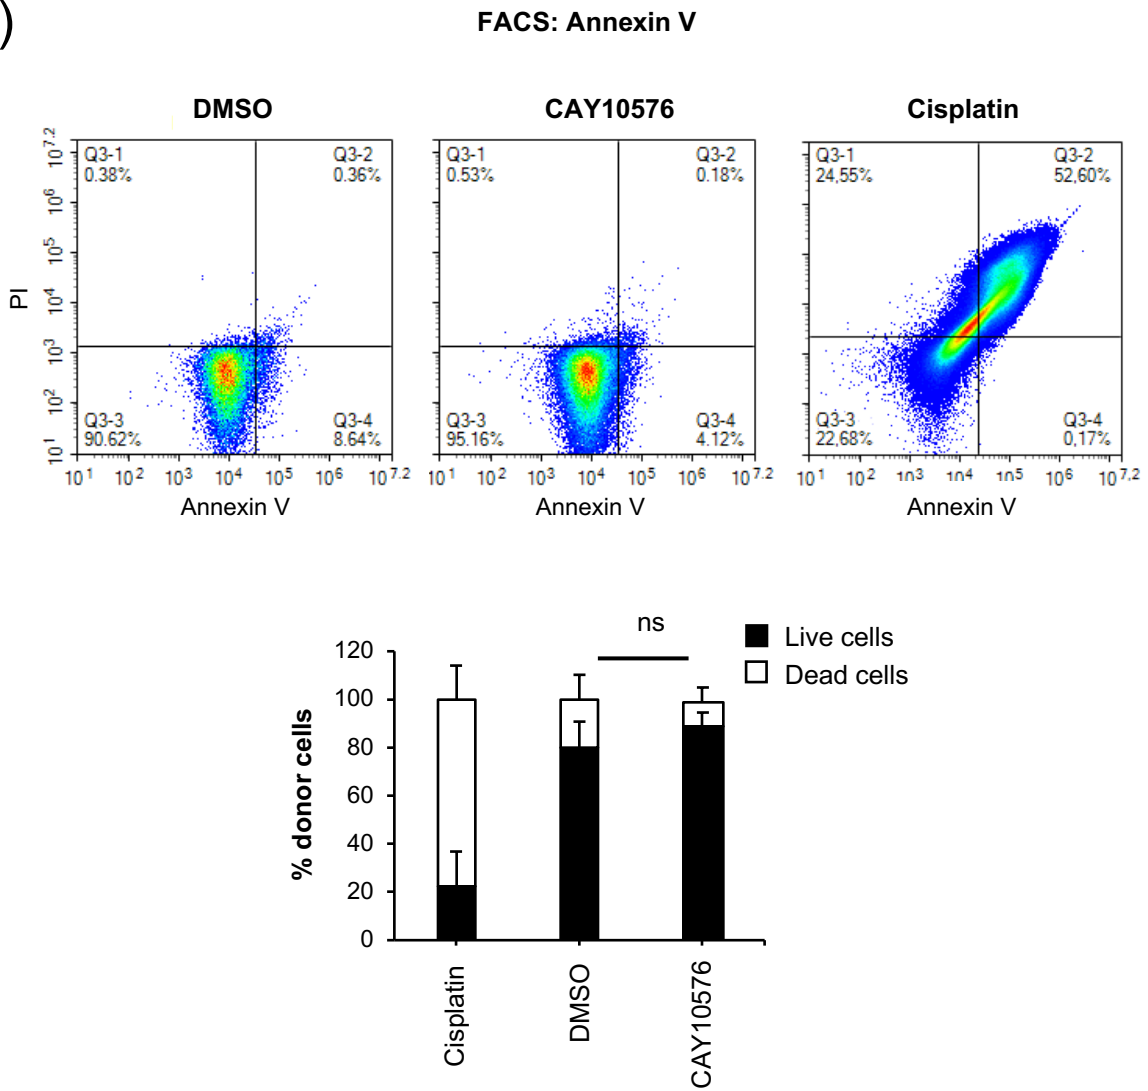

(c)

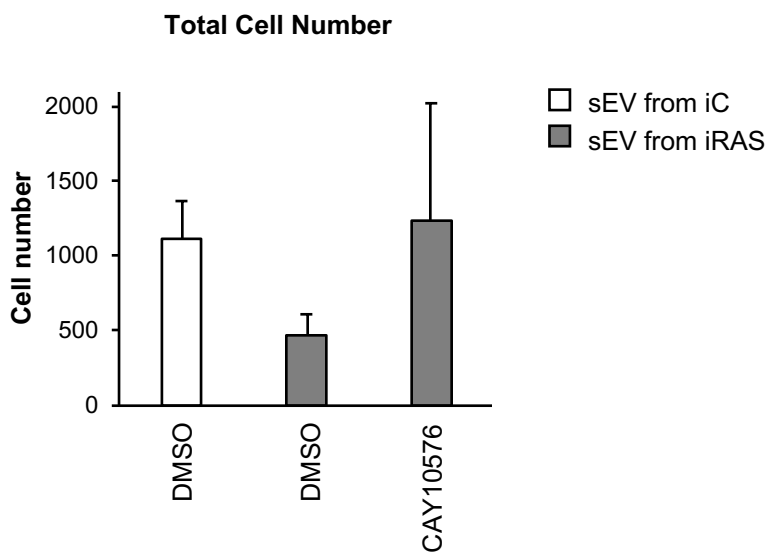

(a)

FACS: Annexin V

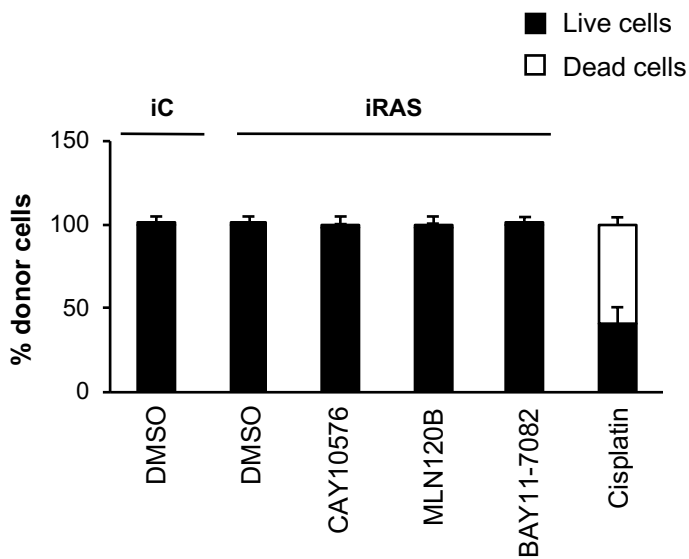

(b)

IF: p65 nuclear staining

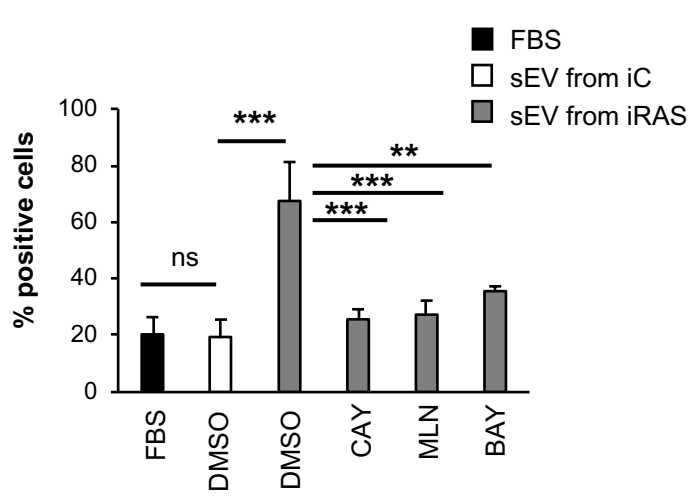

(c)

IF: p65 nuclear staining

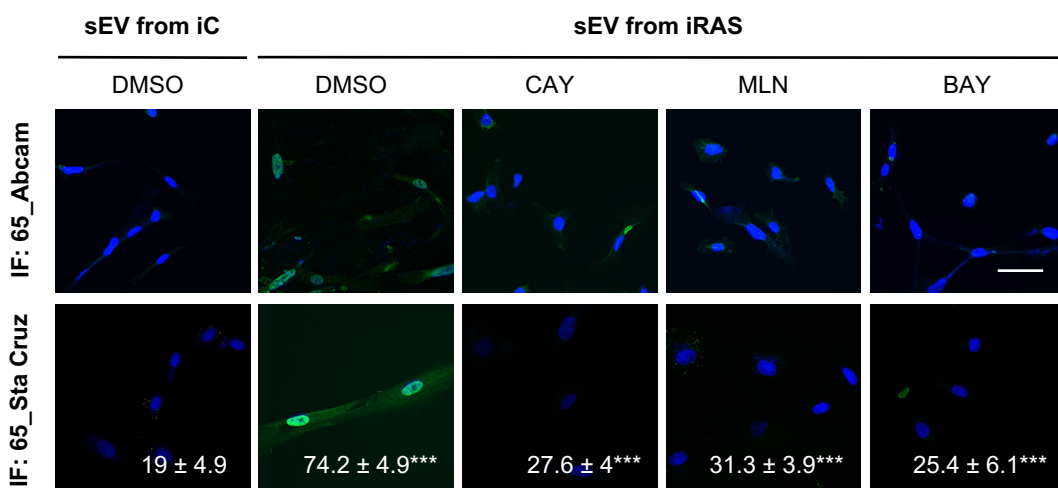

(d)

sEV isolated by SEC followed by UC

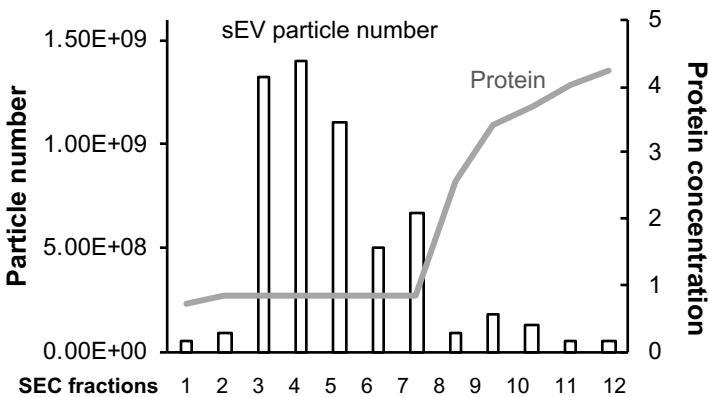

(e)

Quantification mCherry-CD63<sup>+</sup> sEV

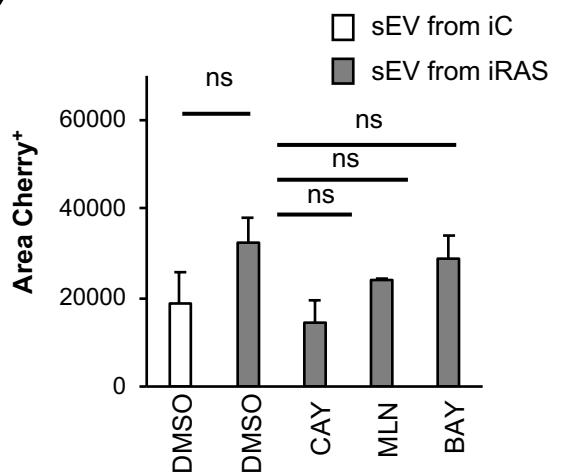

(f)

Pictures internalization mCherry-CD63<sup>+</sup> sEV

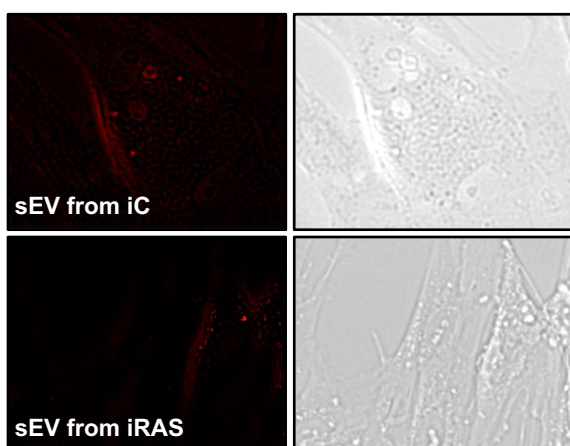

(g)

sEV isolated by SEC followed by UC

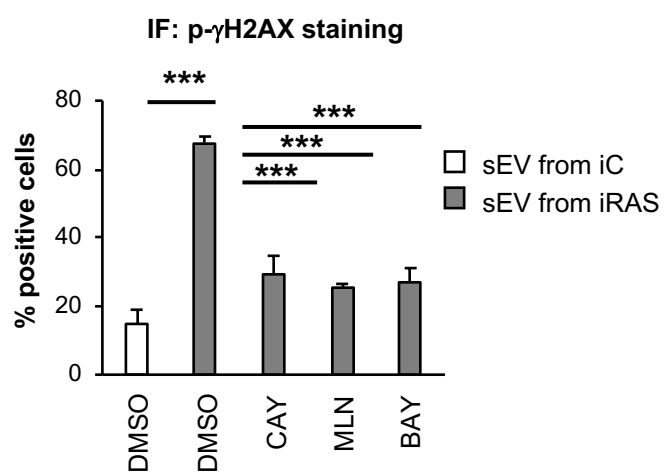

(a)

sgRNA knockdown efficiency

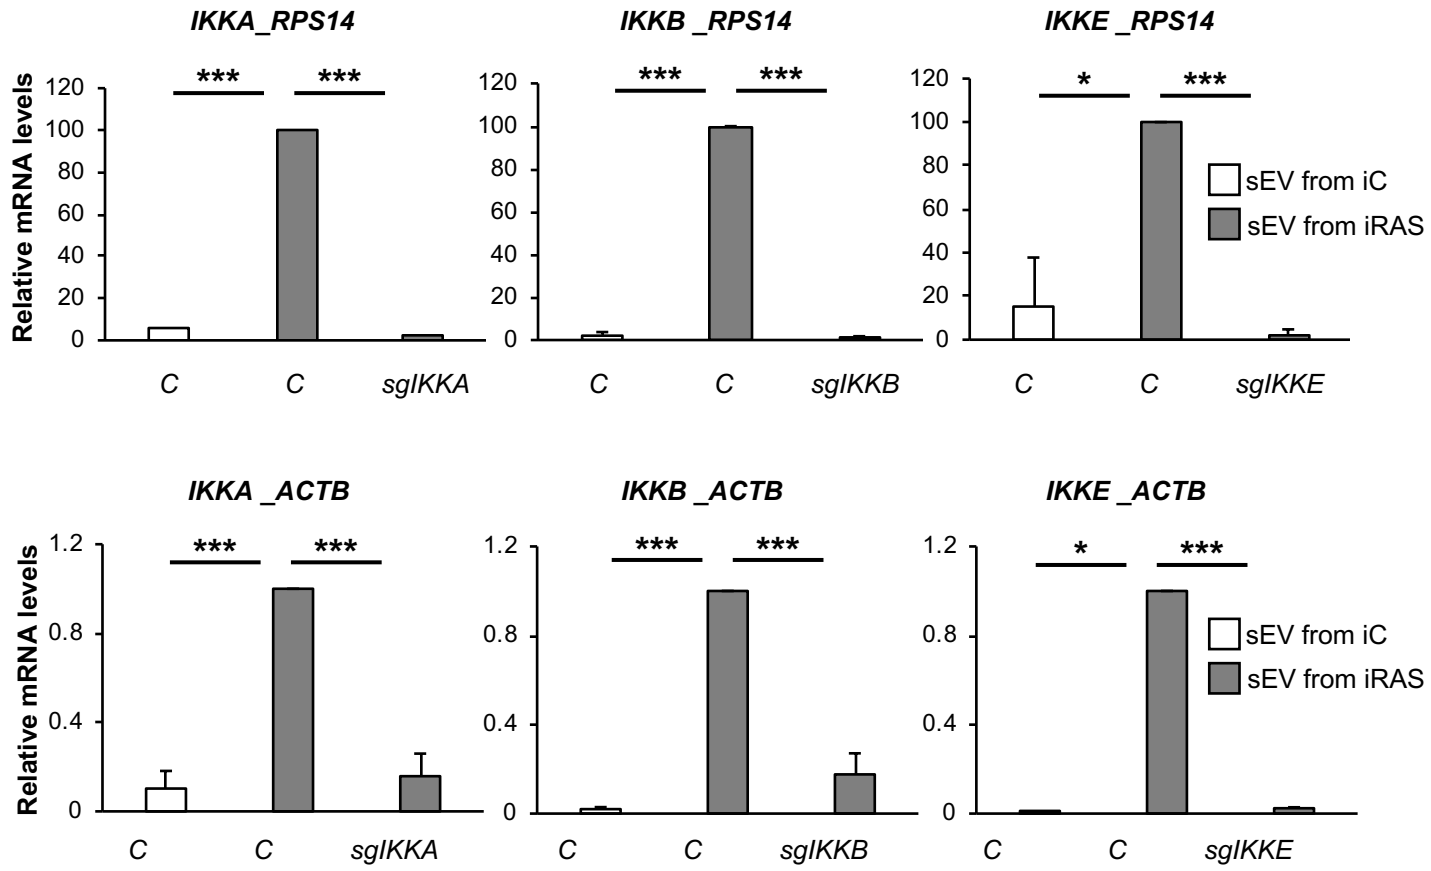

(b)

IF: p65 nuclear staining

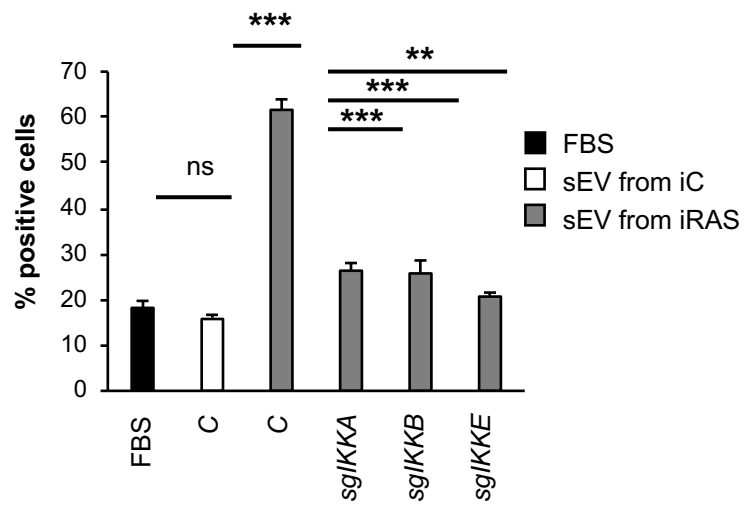

sEV from iC

sEV from iRAS

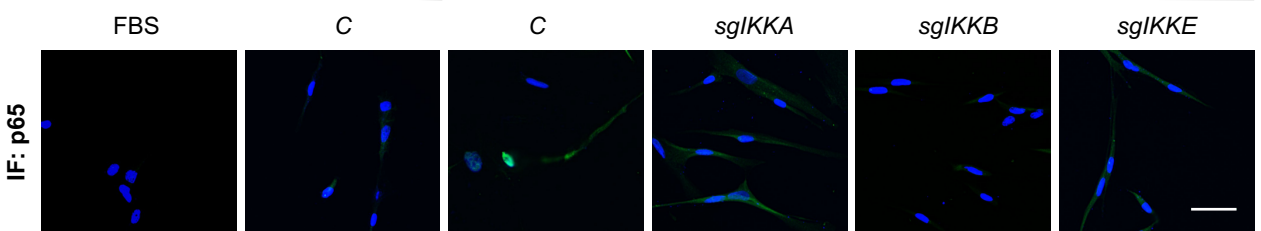

(a)

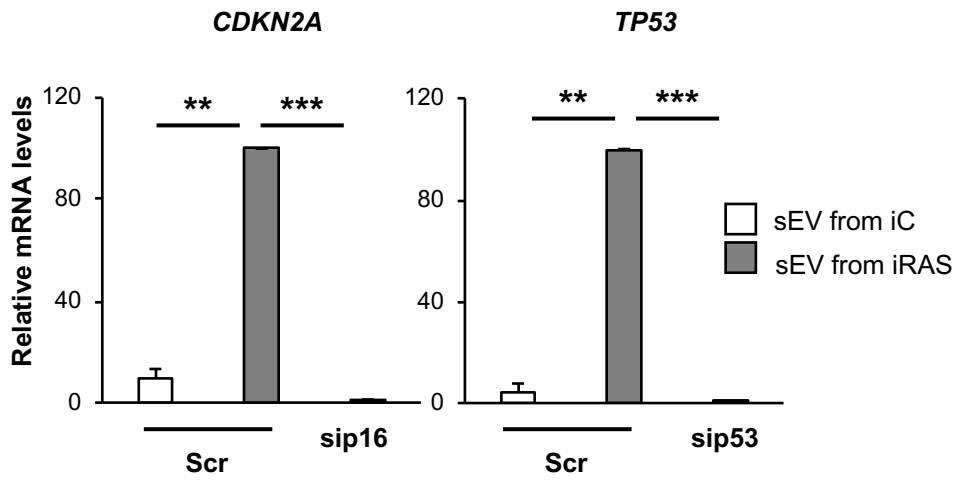

(b)

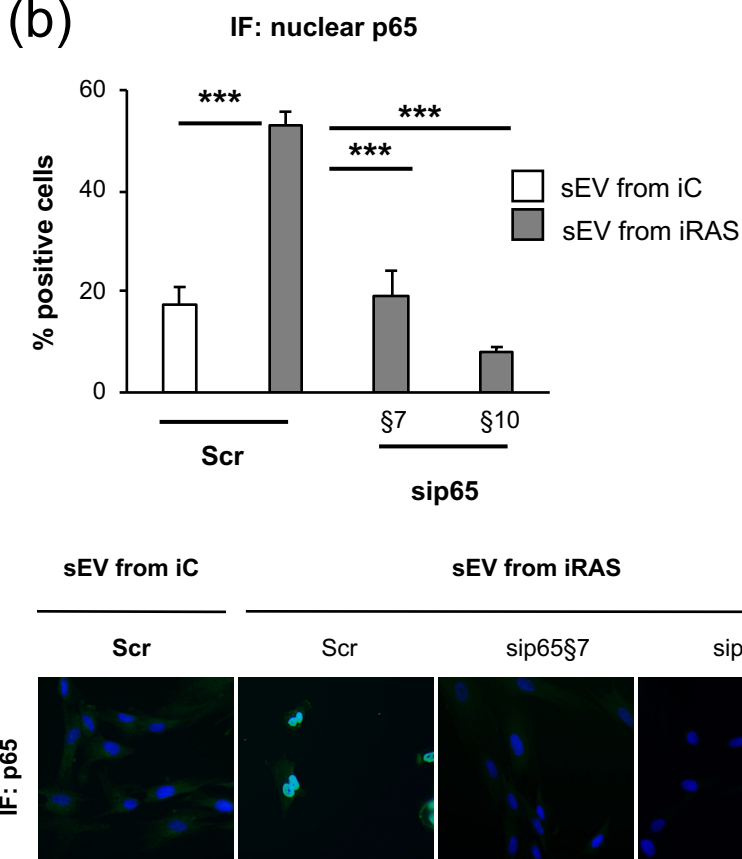

(c)

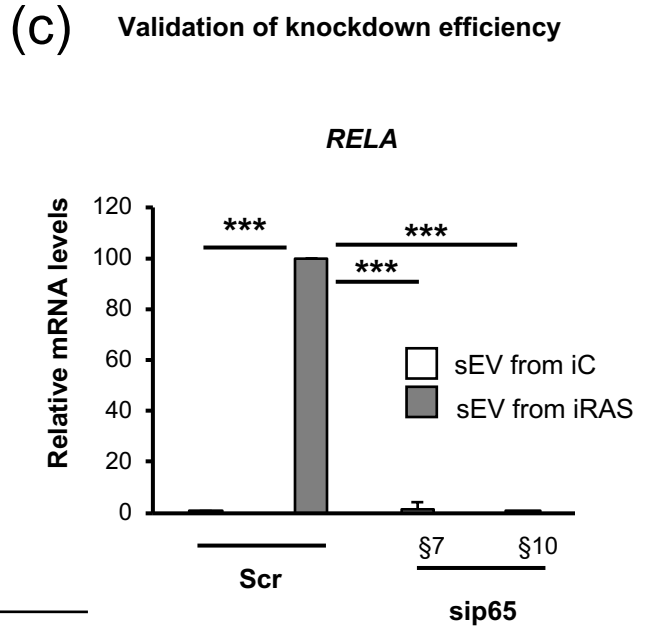

(d)

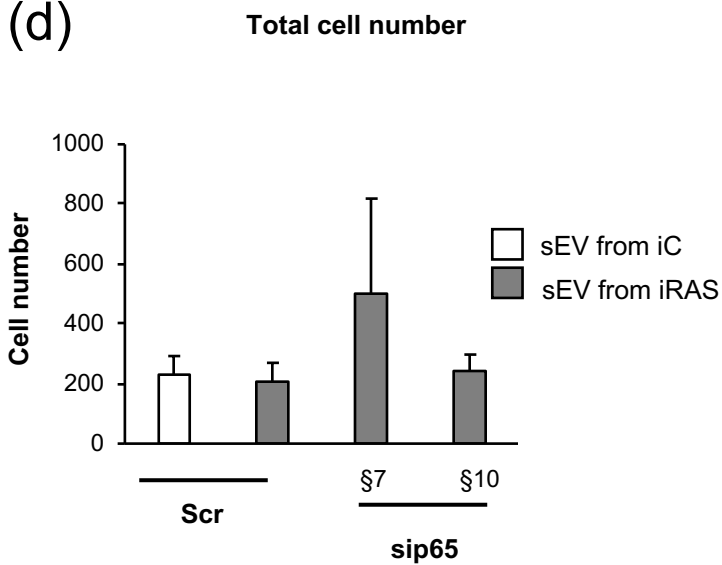

(e)

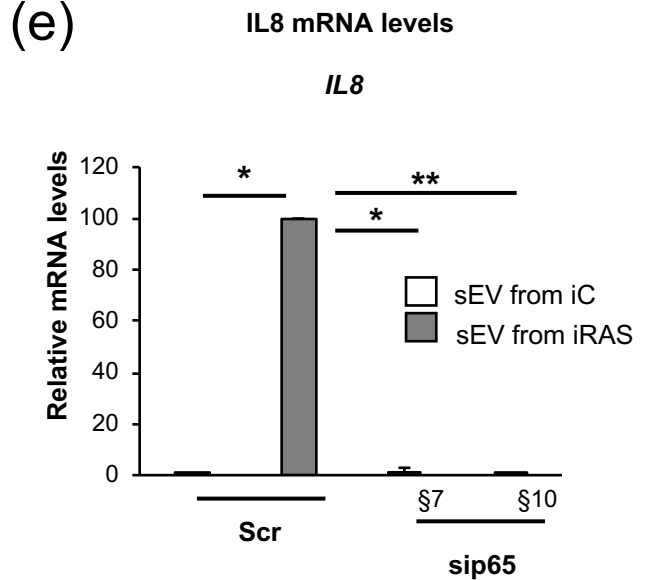

**(a)****sgRNA knockdown efficiency in young fibroblasts**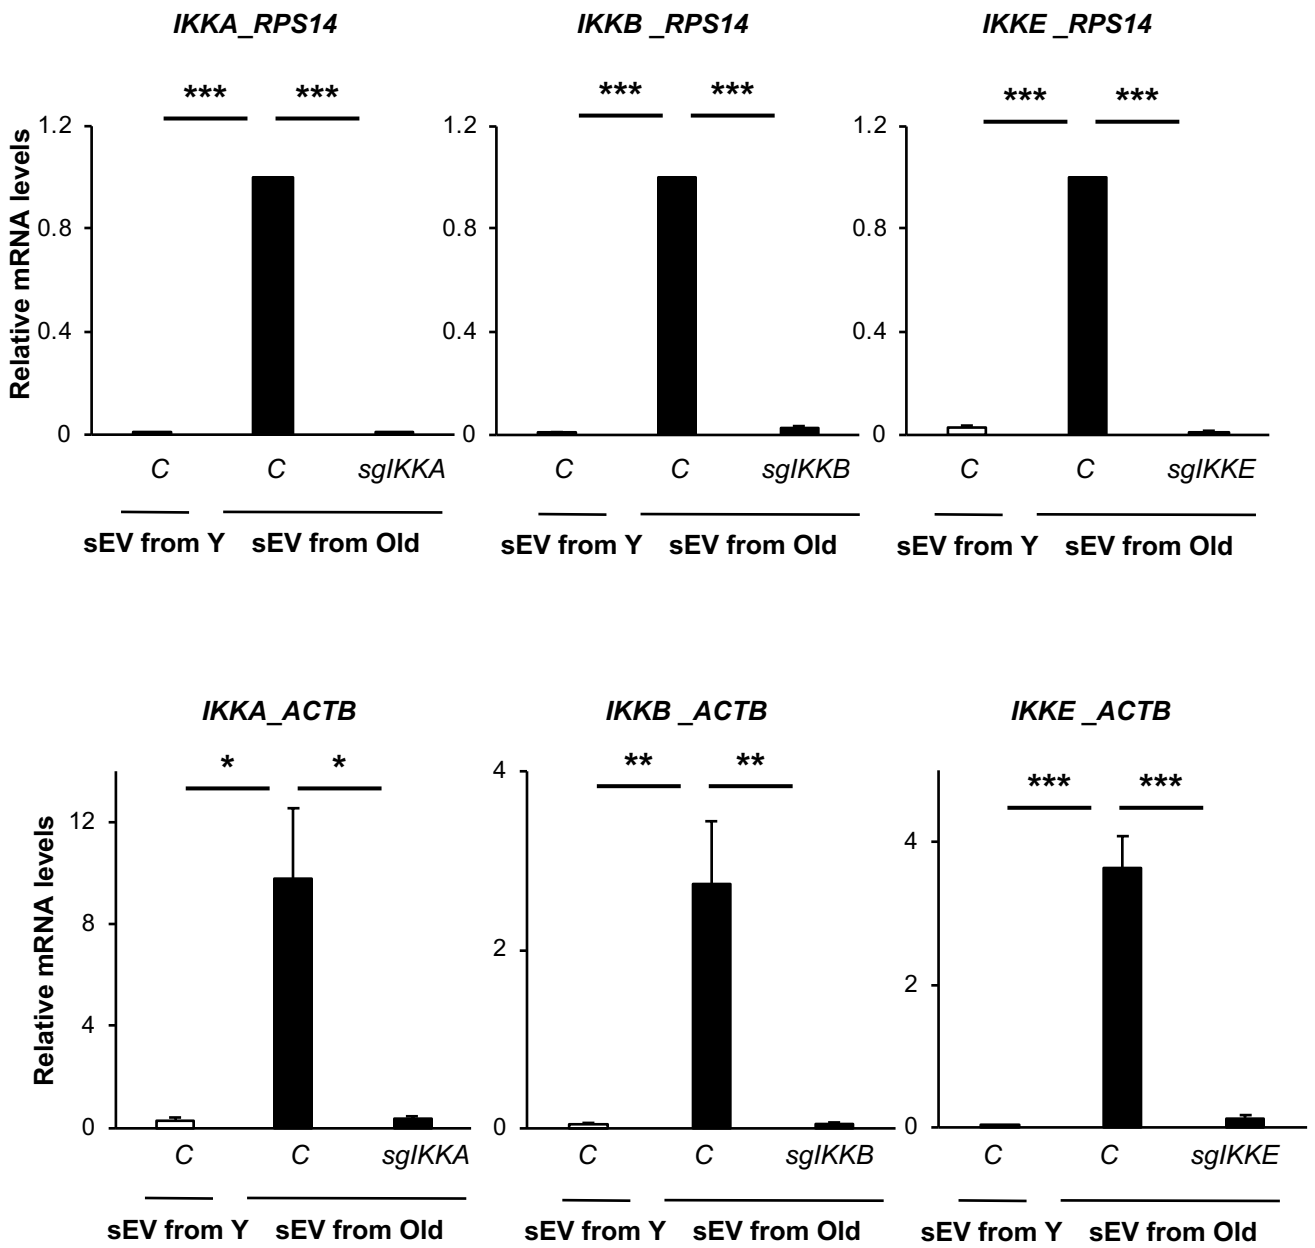

Supplement: ACEL-20-e13426-s001.pdf [file ACEL-20-e13426-s001.pdf]
